# Supplementary material
Source: ML conference proceedings conference paper supplement (https://openaccess.thecvf.com/content/CVPR2025/html/Liao_SPC-GS_Gaussian_Splatting_CVPR_2025_paper.html)
Supplement: Supplementary file 1 [file Liao_SPC-GS_Gaussian_Splatting_CVPR_2025_supplemental.zip]

# SPC-GS: Gaussian Splatting with Semantic-Prompt Consistency for Indoor Open-World Free-view Synthesis from Sparse Inputs

## Supplementary Material

In this appendix, we present additional materials to support and extend the findings and observations presented in the main body of this paper.

- Section A presents more details of the Scene-layout-based Gaussian Initialization (SGI) strategy.
- Section B elaborates on additional experimental details of our approach.
- Section C offers extended experimental analyses to showcase the effectiveness of our method.
- Section D presents more qualitative results to facilitate better visual comparisons.
- Section E provides per-scene quantitative evaluation results for more comprehensive comparisons.

### A. More Details of Scene-layout-based Gaussian Initialization (SGI)

Our proposed SGI strategy includes two main components: *VGM-based Point Creation* and *Scene-layout Point Generation*. *i)* The first component aims to produce denser SfM points by leveraging additional view-changed images that are generated from the original sparse training views. *ii)* The second component yields an instructive scene-layout point distribution for enhanced Gaussian initialization.

Specifically, in the VGM-based Point Creation process, eight neighboring views  $\{\tilde{I}_i^j\}_{j=1}^8$  are generated for each original training image  $I_i$  using the image-to-video generation mode of the advanced video generation model MotionCtrl [47]. Fig. 8 shows these additional view-changed images (denoted by the blue border) alongside the original training view (indicated by the red border). Subsequently, the generated images are combined with the original training images for SfM processing, yielding denser initialized SfM points. As shown in Table 5, we can see that sparse-input training images alone yield limited SfM points. Augmenting the training images with view-changed images increases the amount of SfM points. Furthermore, the Scene-layout Point Generation further produces a scene-layout-wise Gaussian point distribution, serving as an enhanced and instructive initialization prior. Moreover, these results also can be found in Fig. 9.

In general, these results demonstrate that our full SGI framework effectively provides dense and instructive points for Gaussian initialization, which promotes scene Gaussian representation, and consequently, enhances semantic Gaussian learning in sparse-input scenarios.

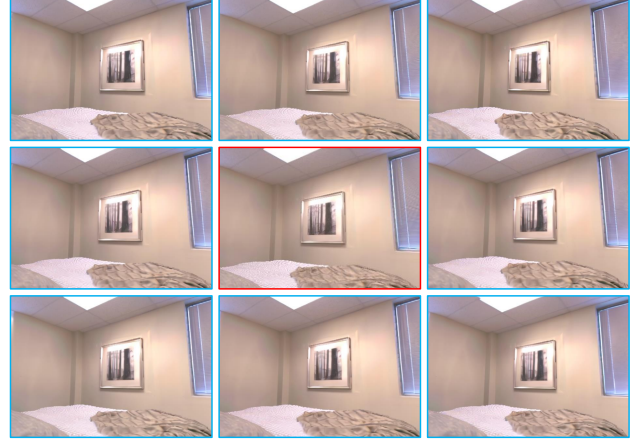

Figure 8. Illustration of training image (red border in the center) and corresponding generated images (blue border).

| Scene     | SfM Points | SfM Points with Generated Views | Scene Layout Points from SGI |
|-----------|------------|---------------------------------|------------------------------|
| Room0     | 122        | 6527                            | 57524                        |
| Room1     | 52         | 5628                            | 58334                        |
| Room2     | 22         | 2659                            | 54308                        |
| Office0   | 474        | 5452                            | 41989                        |
| Office2   | 140        | 2864                            | 44836                        |
| Office4   | 110        | 3621                            | 29115                        |
| Scene0004 | 70         | 4027                            | 64016                        |
| Scene0389 | 19         | 1207                            | 22901                        |
| Scene0494 | 6          | 3125                            | 37195                        |
| Scene0693 | 48         | 2911                            | 44060                        |

Table 5. Number of Gaussian points in various settings. “SfM Points” refers to the initialized Gaussian points derived from the Structure-from-Motion (SfM) algorithm using sparse training images. “SfM Points with Generated Views” indicates the initialized SfM Gaussian points derived from the SfM algorithm using training and generated images. “Scene Layout Points from SGI” denotes the Gaussian points obtained from the Scene-layout Gaussian Initialization (SGI) strategy, which are treated as initialized Gaussian points to optimize the Gaussian radiance field.

### B. Elaborated Experimental Details

#### B.1. Datasets

To evaluate the performance of our approach, we conduct sparse-input open-world free-view synthesis experiments on two widely-used benchmark indoor scene datasets: Replica [42] and ScanNet [8].

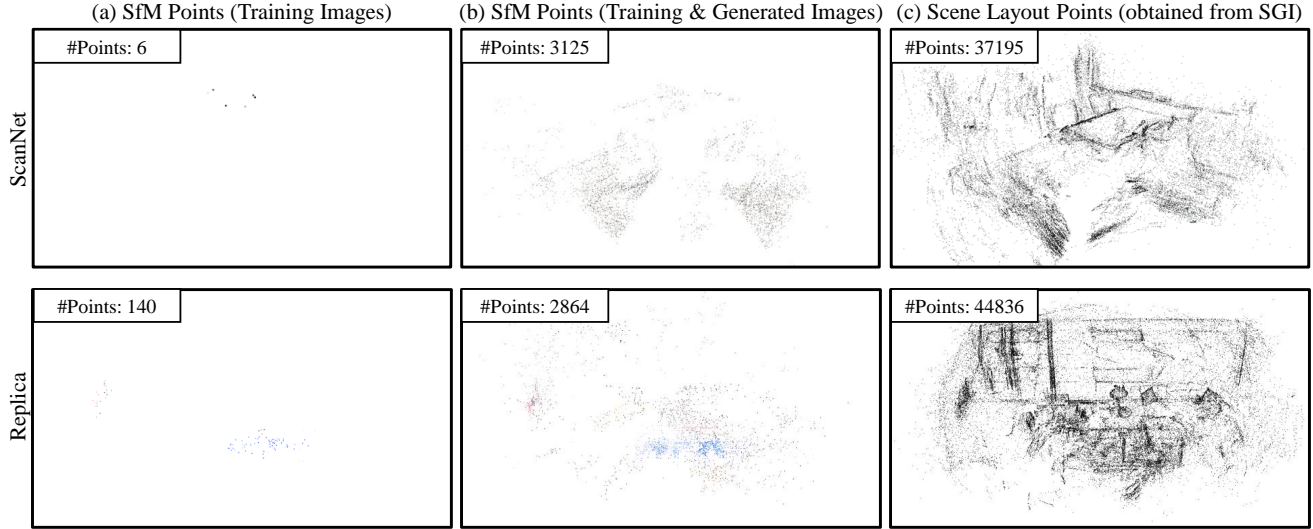

Figure 9. Visualization of Gaussian point distributions of different scenes: (a) Sparsely distributed SfM points from limited training views; (b) Denser SfM points distribution using generated images and training images; (c) Instructive point distribution obtained via our Scene-layout-based Gaussian Initialization (SGI) strategy, demonstrating improved scene layout coverage that enhances reconstruction quality and consequently improves segmentation accuracy.

Replica is a synthetic scene dataset comprising diverse, high-quality indoor room-scale environments. Each scene features photo-realistic textures, dense geometry, and semantic classes. For experiment evaluations, six commonly evaluated scenes from Replica are utilized: room0, room1, room2, office0, office2, and office4. Following 3DOVS [31], 45 categories are used for text queries: candle, book, vent, box, comforter, switch, bin, plant stand, bed, desk organizer, rug, bench, vase, bottle, ceiling, blanket, bowl, camera, wall, blinds, pillar, sculpture, tablet, chair, lamp, indoor plant, cabinet, stool, table, cushion, panel, plate, basket, pot, tissue paper, nightstand, sofa, window, picture, wall plug, tv screen, shelf, door, floor, clock.

ScanNet is a real-world indoor scene dataset that includes semantic segmentation labels and camera poses provided by BundleFusion [9]. For evaluation, four scenes are selected from ScanNet: scene0004\_00, scene0389\_00, scene0494\_00, and scene0693\_00. The commonly used 20 categories defined by ScanNet are used for text queries: wall, floor, cabinet, bed, chair, sofa, table, door, window, bookshelf, picture, counter, desk, curtain, refrigerator, shower curtain, toilet, sink, bathtub, other furniture.

Following the sparse-input experimental protocol outlined in [25, 60], we select every 10-*th* image in the sequence from each scene as the testing view, resulting in 22 to 30 testing images per scene for evaluation. From the remaining images, we uniformly sample 12 views to construct the sparse training set. The resolution of all images is set to  $640 \times 448$ . During training, RGB images from the training set are utilized for scene reconstruction, with CLIP-derived

semantic features applied for semantic Gaussian learning. For evaluation, only the RGB images and ground-truth semantic labels from the testing set are utilized.

## B.2. Implementation Details

**Data Prereprocessing.** Before training, CLIP features are pre-computed offline, following prior methods [31, 59]. The generated images of each training view are obtained using MotionCtrl [47] under the image-to-video mode.

**Training.** We set the learning rate as 0.0025 for Gaussian semantic parameters, while convolution layers  $\omega_f$  and  $\omega_s$  are optimized using Adam with the learning rate of 0.0005. The Outlier Gaussian Primitive Removal (OGR) strategy is implemented every 3k iterations. We first train our model to derive a scene-layout Gaussian point distribution through 10k iterations. These points are then used to initialize Gaussian positions, color attributes (using zero-order spherical harmonics), and semantic attributes, which undergo training for 10k iterations. The entire process costs 45 minutes on average per scene on one A100 GPU.

**Inference.** During inference, we project 3D Gaussians onto the 2D plane, concurrently producing rendered RGB images and rendered semantic features in novel views. Following previous 3D open-world segmentation methods [31, 35], a set of text queries are utilized to calculate the cosine similarity between these text features and the rendered features, generating the open-vocabulary segmentation results. Our approach achieves a rendering speed of over 300 FPS at a resolution of  $640 \times 448$ .

| Method            | Replica [42]    |                 |                    |                 |                 | ScanNet [8]     |                 |                    |                 |                 |
|-------------------|-----------------|-----------------|--------------------|-----------------|-----------------|-----------------|-----------------|--------------------|-----------------|-----------------|
|                   | PSNR $\uparrow$ | SSIM $\uparrow$ | LPIPS $\downarrow$ | mIoU $\uparrow$ | mAcc $\uparrow$ | PSNR $\uparrow$ | SSIM $\uparrow$ | LPIPS $\downarrow$ | mIoU $\uparrow$ | mAcc $\uparrow$ |
| 3DOVS [31]        | 13.326          | 0.520           | 0.656              | 8.859           | 41.909          | 18.836          | 0.652           | 0.535              | 24.001          | 72.863          |
| Feature 3DGS [59] | 18.154          | 0.708           | 0.339              | 16.357          | 64.955          | 19.702          | 0.678           | 0.403              | 21.053          | 72.722          |
| Gau-Grouping [50] | 17.787          | 0.709           | 0.350              | 20.252          | 66.519          | 19.189          | 0.682           | 0.419              | 33.549          | 73.624          |
| DNGaussian [25]   | 19.964          | 0.749           | 0.370              | 23.692          | 70.705          | 20.231          | 0.706           | 0.451              | 32.122          | 74.895          |
| FSGS [60]         | 20.371          | 0.768           | 0.285              | 23.721          | 71.235          | 21.875          | 0.730           | 0.386              | 34.610          | 77.840          |
| CoR-GS [56]       | 20.066          | 0.779           | 0.290              | 22.496          | 68.901          | 21.801          | 0.735           | 0.388              | 34.170          | 77.944          |
| Ours              | <b>22.123</b>   | <b>0.800</b>    | <b>0.248</b>       | <b>29.173</b>   | <b>75.482</b>   | <b>23.042</b>   | <b>0.755</b>    | <b>0.359</b>       | <b>50.271</b>   | <b>83.584</b>   |

Table 6. Quantitative comparison of reconstruction and segmentation results on novel views in Replica and ScanNet datasets, using the CLIP-LSeg [24] to optimize Gaussian semantic attributes with 12 training views. Our approach achieves **superior results** across all metrics on various datasets.

## C. Additional Analyses

In this section, we present additional experimental results to further validate the robustness of our proposed method. Specifically, we conduct comparative analyses using various vision-language foundation models, such as CLIP-LSeg [24] and APE [40], which have been adopted in prior works [36, 59] for optimizing Gaussian semantic attributes. Furthermore, we include a comparative study with ViewCrafter [53]. Additionally, we provide more comprehensive ablation studies to evaluate the effectiveness of different components within our framework.

### C.1. Results using CLIP-LSeg Model

To assess the effectiveness and generalizability of our approach, we utilize CLIP-LSeg [24] for semantic Gaussian optimization and report the quantitative results in Table 6.

*i) Comparison with 3D Open-vocabulary Segmentation Methods.* As shown in Table 6, we see that our method consistently surpasses competitors across all metrics on various datasets when using CLIP-LSeg [24] to optimize Gaussian semantic attributes, while other approaches encounter significant challenges under the sparse input condition.

Specifically, the state-of-the-art method Gau-Grouping [50] demonstrates relatively low reconstruction quality and limited performance in open-world segmentation. This is because it uses sparse SfM points for Gaussian initialization, which hampers its ability to represent complex indoor scenes, resulting in inferior reconstruction quality and impaired segmentation precision. Additionally, Gau-Grouping only applies supervision to Gaussians within sparse training views, leading to the under-optimization problem. As a result, this method tends to overfit the training views while producing less accurate results for novel viewpoints. In comparison, our method utilizes dense scene-layout points and semantic-prompt consistency constraints, yielding improvements of 3.97 PSNR and 8.92% mIoU over the second-best method on the Replica benchmark. These results highlight the effectiveness of our approach for open-world free-view synthesis with sparse inputs.

*ii) Comparison with Sparse-input Free-view Synthesis Methods.* In Table 6, although methods like DNGaussian, FSGS, and CoR-GS achieve improved novel view quality by incorporating additional depth or color regularizations to optimize sparse-view Gaussian radiance fields, our approach consistently surpasses them in both reconstruction quality and semantic understanding accuracy. These improvements can be attributed to the effectiveness of our SGI strategy in enhancing Gaussian representation and the SPC regularization in boosting segmentation accuracy.

In general, these quantitative results validate the effectiveness and generalizability of our approach in 3D indoor open-world free-view synthesis from sparse input images, optimized across different CLIP models. Moreover, the qualitative results using CLIP-LSeg to optimize Gaussian semantic attributes. can be found in Section D and Fig. 17.

### C.2. Results using APE Model

Following GOI [36], we utilize the same Aligning and Prompting Everything All at Once (APE) model [40] to extract 2D semantic features from training views, which are treated as the 2D ground truth semantic features for optimizing Gaussian semantic attributes. Since GOI only supports single-query segmentation results using a vocabulary, rather than generating a relevancy map at a time as outlined in its paper [36], we adopt this single-query segmentation setting to produce sparse-input open-world free-view synthesis results. In line with GOI’s implementations, we employ the sparse-input training images for optimization, and then evaluate the single-query performance in novel views for comparisons.

The single-query segmentation results on ScanNet and Replica test data are illustrated in Fig. 10. It can be seen that GOI generates vague reconstruction results in novel viewpoints. This can be attributed to its limited Gaussian representation stemming from sparse Gaussian point initialization. Consequently, inheriting the bottleneck of inferior Gaussian representation, GOI easily faces challenges and produces incomplete and noisy segmentation results under sparse input conditions.



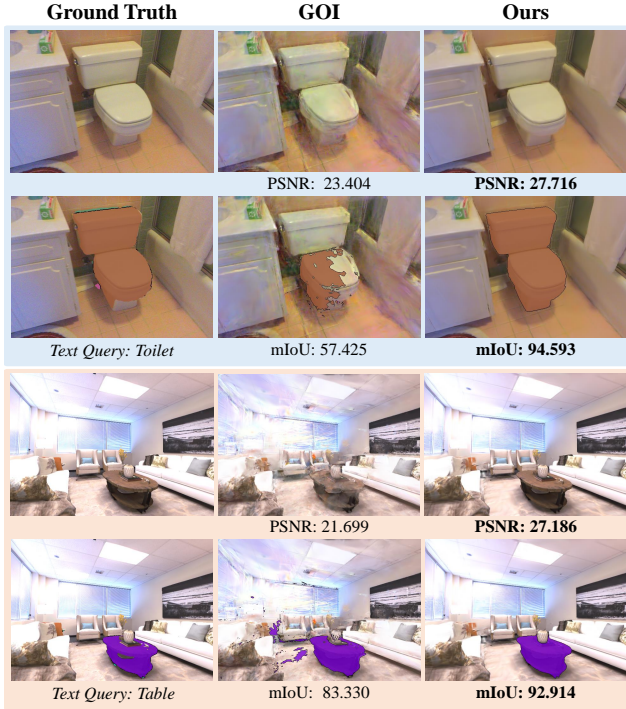

Figure 10. Comparison of reconstruction (rows 1, 3) and open-vocabulary segmentation (rows 2, 4) results on novel views across diverse scenes from the ScanNet and Replica datasets using APE [40] for optimizing Gaussian semantic attributes. Compared to GOI, our approach demonstrates photo-realistic appearance details and more complete segmentation results.

| Method           | Replica [42]  |              |              | ScanNet [8]   |              |              |
|------------------|---------------|--------------|--------------|---------------|--------------|--------------|
|                  | PSNR          | SSIM         | LPIPS        | PSNR          | SSIM         | LPIPS        |
| ViewCrafter [53] | 19.207        | 0.762        | 0.325        | 17.262        | 0.697        | 0.468        |
| Ours             | <b>22.011</b> | <b>0.792</b> | <b>0.254</b> | <b>22.401</b> | <b>0.741</b> | <b>0.368</b> |

Table 7. Quantitative results of reconstruction on novel views.

### C.3. Comparison with ViewCrafter

ViewCrafter [53] employs a pre-trained video generation model to synthesize additional views, aiming to enhance sparse-view 3DGS optimization. However, it inherits the *color shift* artifacts commonly associated with diffusion models, often generating reasonable structures with inaccurate color representations, as shown in the left part of Fig. 11. As a result, its reconstruction performance is inferior, as shown in Table 7 and Fig. 11.

### C.4. More Ablation Studies

In this section, we present more ablation analyses of our approaches for a more comprehensive analysis.

**Effectiveness of OGR.** To assess the effectiveness of the Outlier Gaussian Primitive Removal (OGR), we present ablation results in Fig. 12 and #b of Table 8. As depicted in

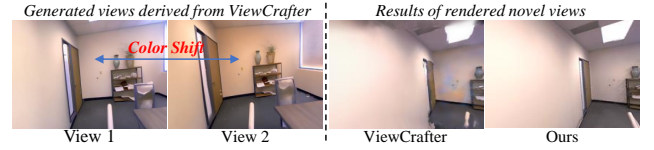

Figure 11. Visual results. Compared to ViewCrafter, our approach exhibits more photo-realistic appearance details.

| Case | Configuration                       | Replica [42]    |                 |                    |                 |                 |
|------|-------------------------------------|-----------------|-----------------|--------------------|-----------------|-----------------|
|      |                                     | PSNR $\uparrow$ | SSIM $\uparrow$ | LPIPS $\downarrow$ | mIoU $\uparrow$ | mAcc $\uparrow$ |
| #a   | Ours (Full Setting)                 | <b>22.011</b>   | <b>0.792</b>    | <b>0.254</b>       | <b>23.960</b>   | <b>63.262</b>   |
| #b   | w/o OGR                             | 21.889          | 0.790           | 0.258              | 22.501          | 62.085          |
| #c   | w $\mathcal{L}_{GR}$                | 20.296          | 0.761           | 0.304              | 19.864          | 57.812          |
| #d   | w 2D CLIP for $\mathcal{L}_{inter}$ | 21.906          | 0.790           | 0.259              | 23.139          | 62.596          |

Table 8. Further ablation results of our approach with various settings.

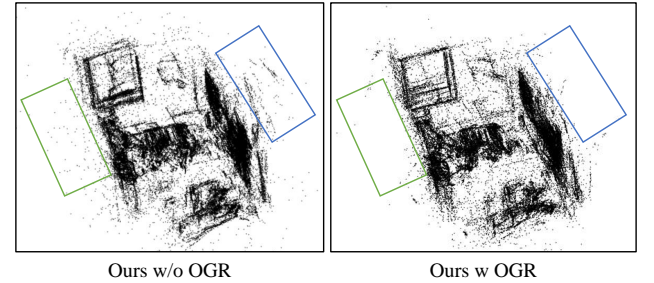

Figure 12. Comparison of Gaussian point clouds with and without Outlier Gaussian Primitive Removal (OGR) strategy. Applying the OGR can reduce outlier Gaussian primitives, facilitating the optimization of Gaussian representations and enhancing results.

Fig. 12, the omission of OGR results in an increased presence of outlier Gaussian primitives. These excessive outlier primitives, when used for subsequent Gaussian initialization, complicate the optimization stage, leading to performance degradation as shown in configuration #b of Table 8. These findings demonstrate the efficacy of the OGR strategy in mitigating outlier proliferation, preserving Gaussian representation quality, and enhancing rendering results.

**Impact of Generated-view Color Supervision.** To investigate the impact of color supervision  $\mathcal{L}_{GR}$  provided by generated images, we present the ablation results in #c of Table 8 and Fig. 13. It can be observed that the addition of color supervision  $\mathcal{L}_{GR}$  leads to performance degradation. This occurs because the reconstruction task is highly sensitive to erroneous color pixels in generated images, as these inaccuracies can significantly degrade reconstruction quality, with even minor color inconsistencies affecting reconstruction quality, as illustrated in Fig. 13.

**Analysis of the Pseudo Supervision Signals.** To analyze the effectiveness of using self-rendered semantic representations from training views for supervising pseudo views in

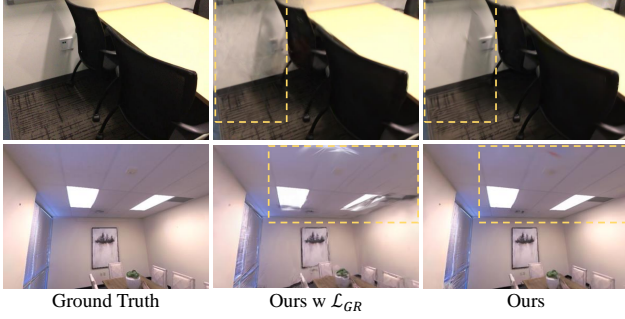

Figure 13. Visual ablation results for using generated-view color supervision  $\mathcal{L}_{GR}$ . Incorporating color supervision  $\mathcal{L}_{GR}$  (“Ours w  $\mathcal{L}_{GR}$ ”) provided from generated RGB images produces inferior results compared to without using  $\mathcal{L}_{GR}$  (“Ours”).

| Case | Configuration | PSNR $\uparrow$ | SSIM $\uparrow$ | LPIPS $\downarrow$ | mIoU $\uparrow$ | mAcc $\uparrow$ |
|------|---------------|-----------------|-----------------|--------------------|-----------------|-----------------|
| #a   | Baseline      | 17.134          | 0.678           | 0.369              | 14.899          | 51.255          |
| #b   | #a + SGI*     | 20.914          | 0.782           | 0.284              | 18.865          | 57.032          |
| #c   | #b + SPC      | 21.806          | 0.792           | 0.254              | 23.202          | 62.057          |

Table 9. Ablation results of our SGI strategy incorporating only vanilla reconstruction loss  $\mathcal{L}_C$  and semantic loss  $\mathcal{L}_S$  (Eq. (3)).

$\mathcal{L}_{inter}$  (i.e. Eq. (5)), we replace them with the 2D CLIP-derived semantics from training views. As shown in #d of Table 8, this replacement leads to degraded performance. This demonstrates the advantage of self-rendered semantic representations derived from the 3D radiance fields exhibit superior coherent and reliable information over the 2D representations, enhancing overall optimization.

**Analysis of the View Constraint in SGI.** We examine the effect of view constraints on 3D Gaussian densification within the SGI by utilizing only two components: the vanilla reconstruction loss  $\mathcal{L}_C$  and semantic loss  $\mathcal{L}_S$  (Eq. (3)), denoted as SGI\* in Table 9. The experimental results demonstrate that our SGI strategy also achieves significant improvements, while the additional application of SPC further enhances performance. These findings indicate that our SGI can generate effective scene-layout Gaussian distributions without relying on specific view constraints.

**Analysis of the Hyperparameter for Region Boundary Erosion.** Table 10 presents an experimental analysis of the erosion hyperparameter used for Region Boundary Erosion. Specifically, the configuration  $3 \times 3$  indicates that a pixel  $M'(x, y)$  is retained as “True” only if all pixels within its  $3 \times 3$  neighborhood in the input original mask  $M$  are “True”; otherwise, it is assigned “False”. This operation effectively contracts region boundaries inward.

The experimental results demonstrate that increasing the size of the erosion hyperparameter, i.e. using a larger kernel, helps reduce the number of ambiguous Gaussian primitives near object boundaries, thereby improving perfor-

| Case | Configuration | PSNR $\uparrow$ | SSIM $\uparrow$ | LPIPS $\downarrow$ | mIoU $\uparrow$ | mAcc $\uparrow$ |
|------|---------------|-----------------|-----------------|--------------------|-----------------|-----------------|
| #a   | $1 \times 1$  | 21.876          | 0.792           | 0.255              | 23.270          | 61.409          |
| #b   | $3 \times 3$  | 21.901          | 0.791           | 0.255              | 23.474          | 62.485          |
| #c   | $5 \times 5$  | <b>22.011</b>   | <b>0.792</b>    | <b>0.254</b>       | <b>23.960</b>   | <b>63.262</b>   |
| #d   | $7 \times 7$  | 21.920          | 0.792           | 0.255              | 23.388          | 62.314          |
| #e   | $9 \times 9$  | 21.950          | 0.792           | 0.255              | 23.182          | 62.349          |

Table 10. Analysis of the erosion hyperparameter for Region Boundary Erosion.

| Point Prompts   | #Train  | PSNR $\uparrow$ | SSIM $\uparrow$ | LPIPS $\downarrow$ | mIoU $\uparrow$ | mAcc $\uparrow$ |
|-----------------|---------|-----------------|-----------------|--------------------|-----------------|-----------------|
| Number=1 (Base) | ~45mins | 22.011          | 0.792           | 0.254              | 23.960          | 63.262          |
| Number=2        | ~50mins | 22.044          | 0.792           | 0.254              | 24.089          | 63.365          |
| Number=3        | ~55mins | 22.034          | 0.792           | 0.254              | 24.364          | 63.440          |

Table 11. Performance for the Iterative Stochastic Prompting (ISP) approach with different settings.

mance. However, excessive erosion diminishes the number of available Gaussians for optimization, potentially limiting performance. Based on these empirical findings, we adopt the  $5 \times 5$  configuration as the final parameter choice.

**Analysis of the Number of Point Prompts in ISP.** In Table 11, we evaluate the performance across varying quantities of point prompts used to establish region mask correspondences. The experimental results demonstrate that increasing point prompt quantities yields performance comparable to the baseline configuration. This finding suggests that the *iterative stochastic design* in the base ISP effectively generates a uniform distribution of points across the entire image space as the training processes. This enables efficient construction of region mask correspondences across diverse image regions. Overall, given the additional training time required for incorporating more point prompts and their marginal performance gains, we opt not to include further point sampling in the final framework.

**Analysis of Lower-Order Spherical Harmonics (SH).** As shown in Table 12, employing lower-order SH under generated view constraints (with  $\mathcal{L}_{GR}$ ) partially alleviates the performance drop in evaluation metrics. However, a noticeable degradation still occurs, primarily due to color inaccuracies in the generated images.

**Analysis of Varying Numbers of Training Views.** As illustrated in Fig. 14, our method demonstrates strong robustness when using varying numbers of training views in Room0, ranging from very sparse (fewer than 10 views, where COLMAP fails) to dense view configurations. The superior segmentation performance is attributed to the proposed semantic-prompt consistency regularization strategy.

## C.5. Limitation Analysis and Future Work

While our SPC-GS framework demonstrates notable advantages in sparse-input open-world free-view synthesis, it is currently limited to static 3D scenes, as it does not incorporate dynamic Gaussian modeling or time-dependent opti-

| Loss                  | SH Setting  | Room0 Scene   |              |              |               |               |
|-----------------------|-------------|---------------|--------------|--------------|---------------|---------------|
|                       |             | PSNR          | SSIM         | LPIPS        | mIoU          | mAcc          |
| wo $\mathcal{L}_{GR}$ | Ours (SH=3) | <b>20.872</b> | <b>0.704</b> | <b>0.322</b> | <b>16.330</b> | <b>52.486</b> |
| w $\mathcal{L}_{GR}$  | SH=0        | 19.040        | 0.674        | 0.372        | 15.066        | 45.537        |
|                       | SH=1        | 18.791        | 0.669        | 0.376        | 13.953        | 45.471        |
|                       | SH=2        | 18.780        | 0.668        | 0.378        | 13.664        | 44.995        |
|                       | SH=3        | 18.766        | 0.664        | 0.380        | 12.358        | 44.700        |

Table 12. Results of different spherical harmonics parameters.

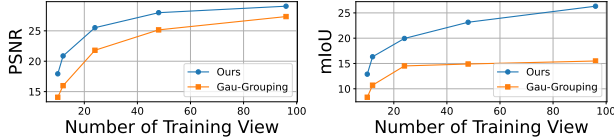

Figure 14. Results using 10, 12, 24, 48, and 96 training views.

mization mechanisms. Future research directions could explore the extension of our method to dynamic open-world free-view synthesis, enabling temporal scene modeling.

## D. More Visualization Results

We provide additional qualitative results in Fig. 15, 16 and 17 to better illustrate the effectiveness of our method.

i) *Reconstruction*. As shown in Fig. 15, the results produced by 3DOVS and Gau-Grouping exhibit significant artifacts due to the limited radiance field representation quality when relying solely on sparse-input training data. Although FSGS and CoR-GS introduce additional geometric constraints to enhance Gaussian radiance fields under sparse input conditions, they struggle to obtain photo-realistic details. In contrast, our approach effectively reduces artifacts and ambiguity, presenting a more robust global structure with finer details, especially in rendered views distant from the training viewpoints (e.g. 3<sup>rd</sup> and 5<sup>th</sup> rows). These improvements can be attributed to our SGI and SPC strategies, which contribute to an enhanced Gaussian distribution and enforce effective view-consistency supervision, thereby improving the overall quality of Gaussian representation.

ii) *Open-world Segmentation*. As shown in Fig. 16, when using the CLIP model [37] for optimizing Gaussian semantic attributes, existing methods struggle to achieve precise object boundaries and maintain object integrity. Specifically, 3D open-vocabulary segmentation methods, such as LangSplat and Gau-Grouping, are hindered by the inferior Gaussian point distributions, which consequently impede the semantic Gaussian representation and easily lead to noisy rendered semantic results (e.g. *Chair* in the 1<sup>st</sup> row). Notably, LangSplat exhibits more pronounced noise (1<sup>st</sup> ~ 2<sup>nd</sup> rows) and even inaccurate semantic renderings (3<sup>rd</sup> ~ 4<sup>th</sup> rows) in sparse-input scenarios. This stems from a key factor: during semantic parameter opti-

mization, LangSplat inherits Gaussian attributes (*i.e.* position, scaling, and rotation) derived from sparse-input scene reconstruction using the vanilla 3DGS, and only optimizes the semantic parameter to obtain semantic Gaussian representation. By fixing the Gaussian primitives’ attributes, LangSplat prevents flexible adjustment of semantic representations, thereby inheriting the inherent bottlenecks of sparse-input scene reconstruction and significantly compromising segmentation performance.

Moreover, while sparse-input free-view synthesis methods, such as DNGaussian and CoR-GS, introduce geometric constraints to improve Gaussian representation, they still easily face challenges with semantic ambiguity due to insufficient semantic consistency supervision.

In contrast, our method delivers robust and accurate segmentation results, benefiting from the enhanced Gaussian distribution and effective semantic-prompt consistency supervision. Additional visualizations in Fig. 17 further demonstrate that, when optimized with the CLIP-LSeg model [24], our approach consistently outperforms others across diverse scenes, underscoring its robustness in 3D open-vocabulary semantic understanding.

In summary, our approach simultaneously delivers photorealistic rendering quality and superior segmentation performance across diverse scenes. This comprehensive evaluation highlights the effectiveness of our approach for sparse-input open-world free-view synthesis.

## E. Per-scene Qualitative Results

In Tables 13 and 14, we present per-scene quantitative comparisons of reconstruction and segmentation results on novel views, utilizing CLIP and CLIP-LSeg for optimizing Gaussian semantic attributes, respectively. Overall, our approach consistently surpasses other state-of-the-art methods in terms of reconstruction and segmentation on synthetic and real-world scenes. These results highlight the effectiveness of our method in indoor open-world free-view synthesis using sparse-input data.



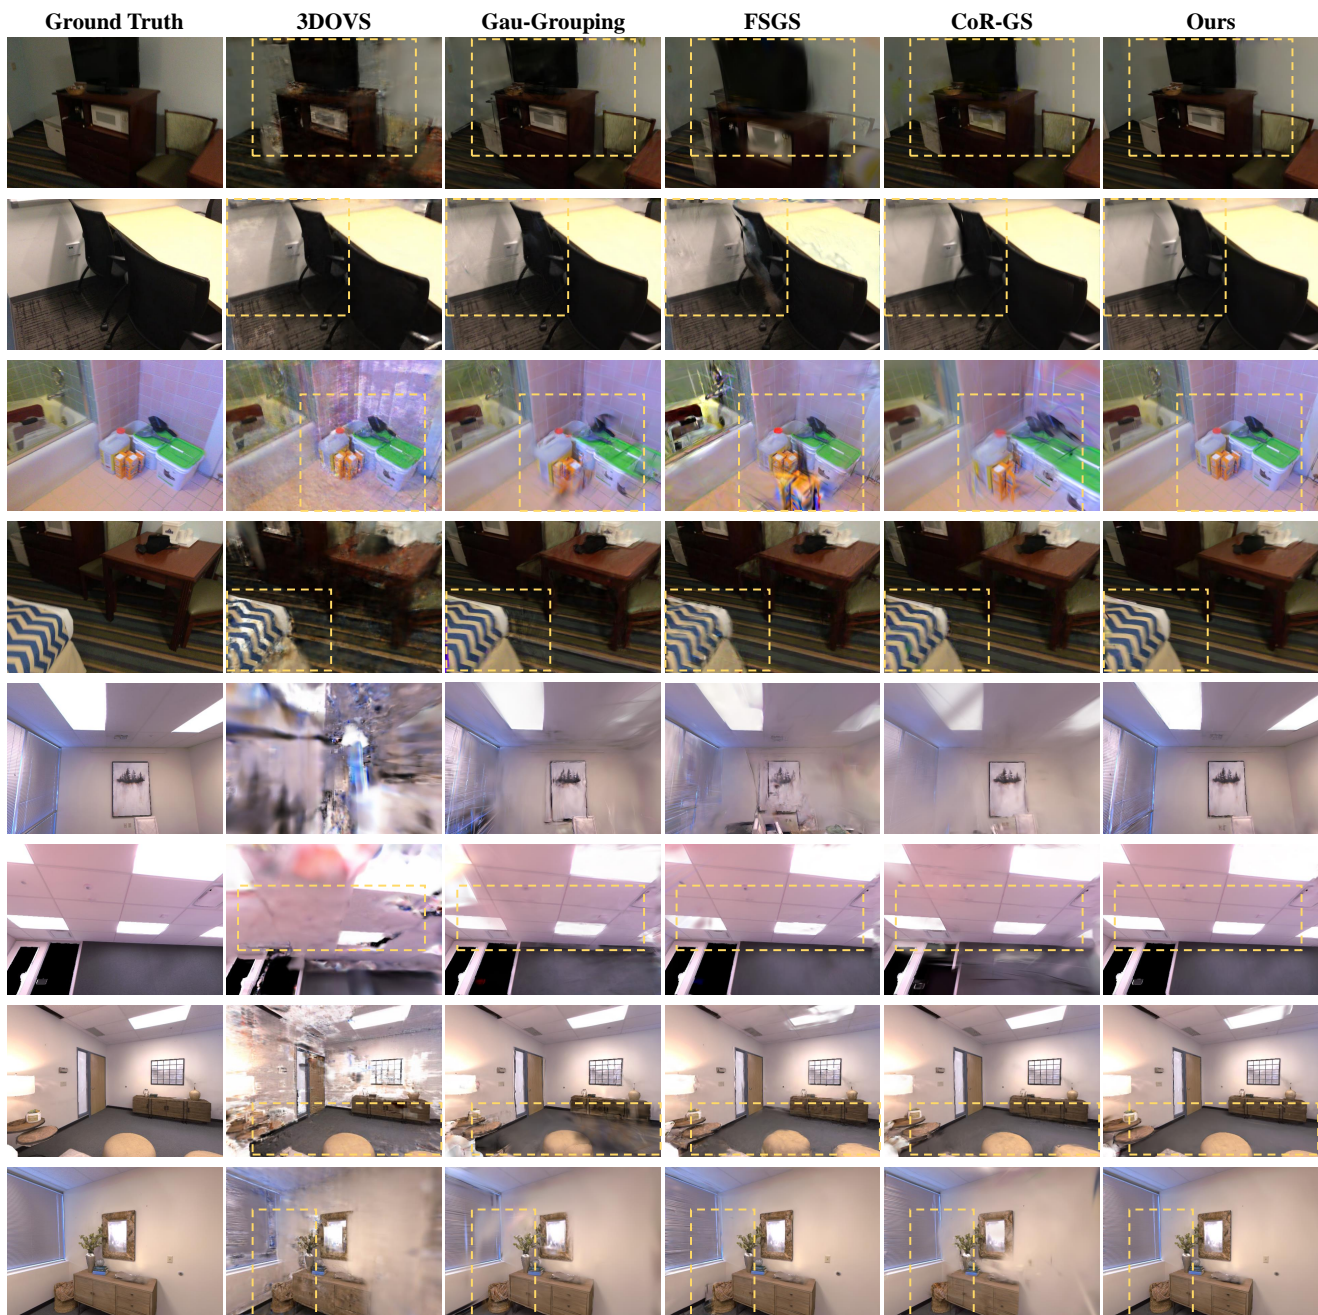

Figure 15. Visual reconstruction results on novel views from the ScanNet dataset ( $1^{st} \sim 4^{th}$  Rows) and the Replica dataset ( $5^{th} \sim 8^{th}$  Rows), using 12 input views for training. Our approach achieves superior global structure and photo-realistic details, attributed to our enhanced Gaussian representation and effective view-consistency constraints. More detailed analyses refer to Section D.

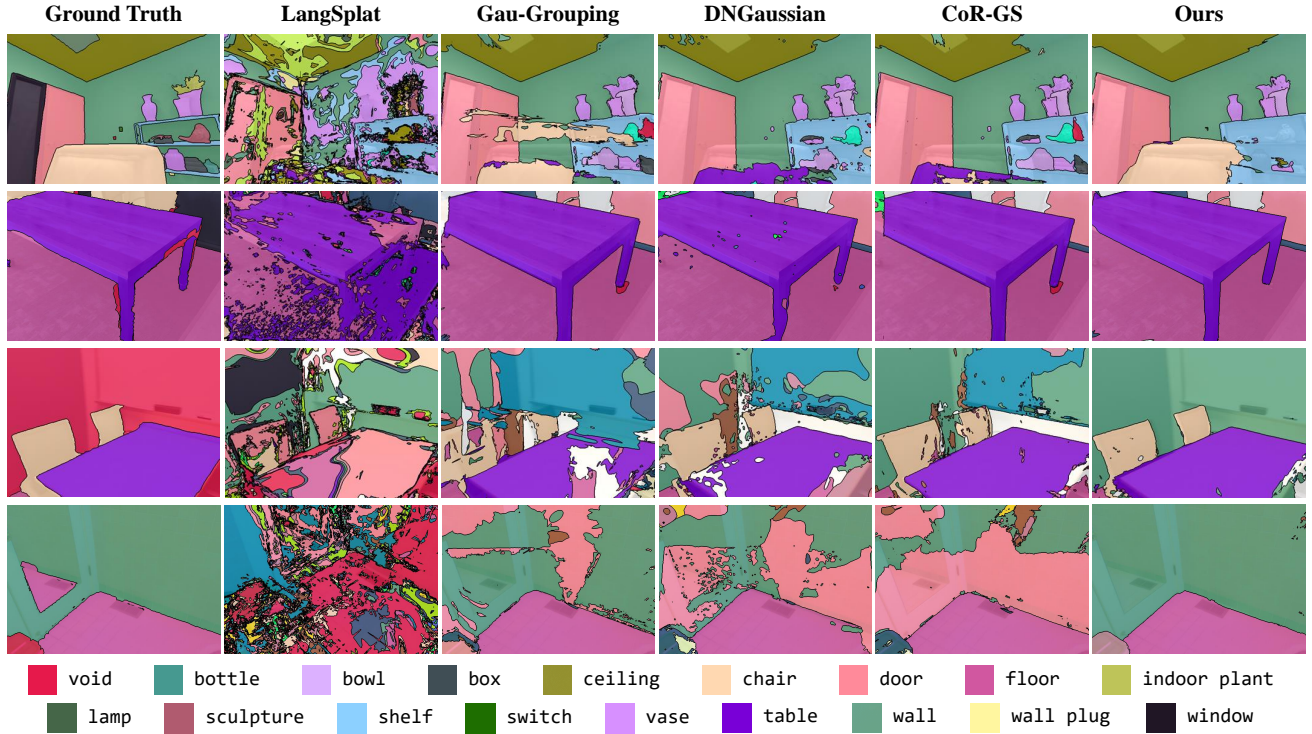

Figure 16. Visual open-world segmentation results on novel views from the Replica dataset (1<sup>st</sup> Row) and the ScanNet dataset (3<sup>rd</sup> ~ 4<sup>th</sup> Rows) when using the CLIP [37] to optimize Gaussian semantic attributes, with 12 training views. Our method produces more accurate and complete results thanks to the enhanced Gaussian points distribution and semantic consistency constraints.

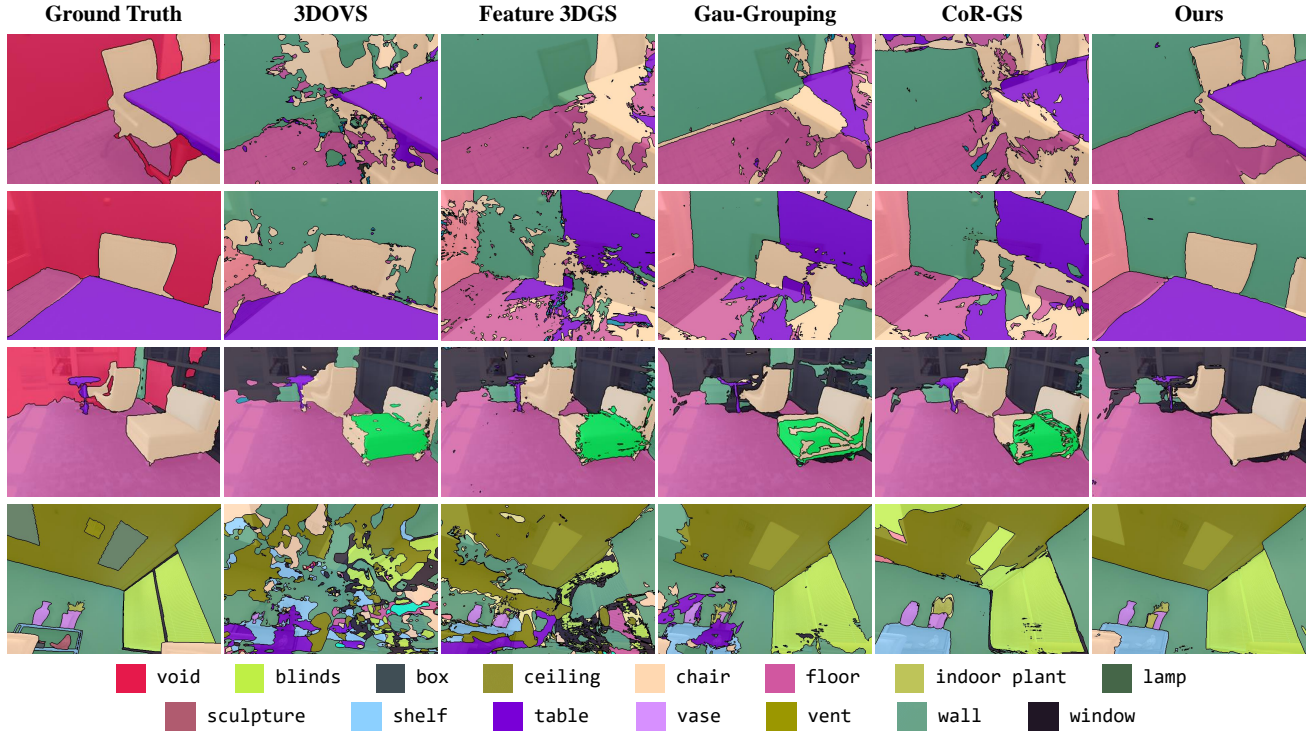

Figure 17. Visual open-world segmentation results on novel views from the ScanNet dataset (1<sup>st</sup> ~ 3<sup>rd</sup> Rows) and the Replica dataset (4<sup>th</sup> Row) when using the CLIP-LSeg model [24] for optimizing Gaussian semantic attributes, with 12 training views. Our approach consistently demonstrates superior precision.



| Method            | Room0           |                 |                    |                 |                 | Room1           |                 |                    |                 |                 |
|-------------------|-----------------|-----------------|--------------------|-----------------|-----------------|-----------------|-----------------|--------------------|-----------------|-----------------|
|                   | PSNR $\uparrow$ | SSIM $\uparrow$ | LPIPS $\downarrow$ | mIoU $\uparrow$ | mAcc $\uparrow$ | PSNR $\uparrow$ | SSIM $\uparrow$ | LPIPS $\downarrow$ | mIoU $\uparrow$ | mAcc $\uparrow$ |
| 3DOVS [31]        | 16.198          | 0.554           | 0.467              | 5.547           | 32.699          | 14.643          | 0.496           | 0.674              | 3.166           | 18.421          |
| Feature 3DGS [59] | 15.991          | 0.595           | 0.425              | 6.402           | 32.734          | 17.485          | 0.674           | 0.373              | 5.959           | 22.927          |
| LangSplat [35]    | 16.481          | 0.580           | 0.407              | 2.924           | 20.102          | 17.116          | 0.639           | 0.393              | 2.167           | 17.038          |
| Gau-Grouping [50] | 15.978          | 0.599           | 0.436              | 10.712          | 40.774          | 16.400          | 0.639           | 0.410              | 12.709          | 46.494          |
| DNGaussian [25]   | 16.005          | 0.601           | 0.492              | 11.274          | 42.377          | 19.353          | 0.691           | 0.406              | 16.883          | 53.758          |
| FSGS [60]         | 18.437          | 0.650           | 0.365              | 12.695          | 44.934          | 18.516          | 0.671           | 0.356              | 16.065          | 56.217          |
| CoR-GS [56]       | 18.813          | 0.688           | 0.357              | 12.747          | 44.289          | 19.526          | 0.725           | 0.327              | 16.158          | 51.927          |
| Ours              | <b>20.872</b>   | <b>0.704</b>    | <b>0.322</b>       | <b>16.330</b>   | <b>52.486</b>   | <b>22.363</b>   | <b>0.750</b>    | <b>0.264</b>       | <b>29.022</b>   | <b>74.166</b>   |

  

| Method            | Room2           |                 |                    |                 |                 | Office0         |                 |                    |                 |                 |
|-------------------|-----------------|-----------------|--------------------|-----------------|-----------------|-----------------|-----------------|--------------------|-----------------|-----------------|
|                   | PSNR $\uparrow$ | SSIM $\uparrow$ | LPIPS $\downarrow$ | mIoU $\uparrow$ | mAcc $\uparrow$ | PSNR $\uparrow$ | SSIM $\uparrow$ | LPIPS $\downarrow$ | mIoU $\uparrow$ | mAcc $\uparrow$ |
| 3DOVS [31]        | 13.536          | 0.567           | 0.669              | 4.633           | 25.459          | 14.317          | 0.485           | 0.680              | 2.156           | 9.580           |
| Feature 3DGS [59] | 15.484          | 0.705           | 0.384              | 7.139           | 29.271          | 20.719          | 0.768           | 0.279              | 6.430           | 21.632          |
| LangSplat [35]    | 18.092          | 0.740           | 0.314              | 4.277           | 27.811          | 21.543          | 0.774           | 0.277              | 1.852           | 11.097          |
| Gau-Grouping [50] | 19.359          | 0.756           | 0.313              | 17.657          | 69.003          | 20.128          | 0.738           | 0.334              | 11.485          | 29.045          |
| DNGaussian [25]   | 20.626          | 0.767           | 0.353              | 17.229          | 70.091          | 20.552          | 0.759           | 0.362              | 13.055          | 32.788          |
| FSGS [60]         | 18.295          | 0.740           | 0.343              | 15.562          | 65.899          | 21.762          | 0.789           | 0.262              | 13.548          | 31.720          |
| CoR-GS [56]       | 18.648          | 0.783           | 0.303              | 15.270          | 64.398          | 22.056          | 0.804           | 0.251              | 13.020          | 31.989          |
| Ours              | <b>23.267</b>   | <b>0.835</b>    | <b>0.209</b>       | <b>21.112</b>   | <b>73.906</b>   | <b>23.382</b>   | <b>0.821</b>    | <b>0.246</b>       | <b>16.488</b>   | <b>34.438</b>   |

  

| Method            | Office2         |                 |                    |                 |                 | Office4         |                 |                    |                 |                 |
|-------------------|-----------------|-----------------|--------------------|-----------------|-----------------|-----------------|-----------------|--------------------|-----------------|-----------------|
|                   | PSNR $\uparrow$ | SSIM $\uparrow$ | LPIPS $\downarrow$ | mIoU $\uparrow$ | mAcc $\uparrow$ | PSNR $\uparrow$ | SSIM $\uparrow$ | LPIPS $\downarrow$ | mIoU $\uparrow$ | mAcc $\uparrow$ |
| 3DOVS [31]        | 9.716           | 0.496           | 0.760              | 3.228           | 18.629          | 10.789          | 0.490           | 0.726              | 4.748           | 23.844          |
| Feature 3DGS [59] | 16.758          | 0.752           | 0.338              | 8.096           | 34.719          | 15.915          | 0.708           | 0.352              | 10.416          | 39.970          |
| LangSplat [35]    | 18.237          | 0.779           | 0.779              | 3.802           | 12.832          | 14.821          | 0.694           | 0.348              | 4.729           | 22.844          |
| Gau-Grouping [50] | 16.133          | 0.716           | 0.381              | 19.108          | 67.423          | 15.784          | 0.695           | 0.380              | 18.500          | 49.792          |
| DNGaussian [25]   | 19.100          | 0.765           | 0.369              | 21.779          | 76.004          | 15.438          | 0.686           | 0.429              | 19.723          | 51.380          |
| FSGS [60]         | 18.261          | 0.777           | 0.310              | 19.737          | 71.854          | 16.893          | 0.724           | 0.334              | 18.998          | 50.224          |
| CoR-GS [56]       | 17.313          | 0.781           | 0.325              | 18.187          | 70.760          | 17.374          | 0.768           | 0.309              | 20.220          | 51.490          |
| Ours              | <b>23.095</b>   | <b>0.858</b>    | <b>0.204</b>       | <b>35.109</b>   | <b>87.375</b>   | <b>19.087</b>   | <b>0.785</b>    | <b>0.275</b>       | <b>25.697</b>   | <b>57.201</b>   |

  

| Method            | scene0004       |                 |                    |                 |                 | scene0389       |                 |                    |                 |                 |
|-------------------|-----------------|-----------------|--------------------|-----------------|-----------------|-----------------|-----------------|--------------------|-----------------|-----------------|
|                   | PSNR $\uparrow$ | SSIM $\uparrow$ | LPIPS $\downarrow$ | mIoU $\uparrow$ | mAcc $\uparrow$ | PSNR $\uparrow$ | SSIM $\uparrow$ | LPIPS $\downarrow$ | mIoU $\uparrow$ | mAcc $\uparrow$ |
| 3DOVS [31]        | 17.894          | 0.615           | 0.496              | 10.406          | 51.940          | 21.550          | 0.731           | 0.525              | 7.919           | 45.842          |
| Feature 3DGS [59] | 16.489          | 0.600           | 0.434              | 8.447           | 51.692          | 21.061          | 0.741           | 0.383              | 10.063          | 46.725          |
| LangSplat [35]    | 16.656          | 0.605           | 0.427              | 5.499           | 43.347          | 23.720          | 0.791           | 0.352              | 4.545           | 34.339          |
| Gau-Grouping [50] | 17.837          | 0.634           | 0.424              | 10.416          | 54.014          | 23.241          | 0.785           | 0.366              | 24.414          | 78.311          |
| DNGaussian [25]   | 17.810          | 0.670           | 0.506              | 9.460           | 53.999          | 20.818          | 0.739           | 0.442              | 20.590          | 70.258          |
| FSGS [60]         | 19.011          | 0.645           | 0.419              | 9.934           | 55.340          | 24.681          | 0.796           | 0.354              | 21.265          | 73.597          |
| CoR-GS [56]       | 18.961          | 0.662           | 0.407              | 10.582          | 54.445          | 25.098          | 0.812           | 0.338              | 23.462          | 75.366          |
| Ours              | <b>19.131</b>   | <b>0.677</b>    | <b>0.404</b>       | <b>13.411</b>   | <b>64.718</b>   | <b>27.232</b>   | <b>0.838</b>    | <b>0.329</b>       | <b>48.243</b>   | <b>82.017</b>   |

  

| Method            | scene0494       |                 |                    |                 |                 | scene0693       |                 |                    |                 |                 |
|-------------------|-----------------|-----------------|--------------------|-----------------|-----------------|-----------------|-----------------|--------------------|-----------------|-----------------|
|                   | PSNR $\uparrow$ | SSIM $\uparrow$ | LPIPS $\downarrow$ | mIoU $\uparrow$ | mAcc $\uparrow$ | PSNR $\uparrow$ | SSIM $\uparrow$ | LPIPS $\downarrow$ | mIoU $\uparrow$ | mAcc $\uparrow$ |
| 3DOVS [31]        | 16.446          | 0.663           | 0.577              | 6.162           | 31.342          | 18.996          | 0.561           | 0.580              | 6.516           | 16.300          |
| Feature 3DGS [59] | 14.304          | 0.649           | 0.445              | 5.571           | 31.384          | 20.497          | 0.635           | 0.436              | 5.309           | 22.209          |
| LangSplat [35]    | 15.235          | 0.646           | 0.646              | 2.409           | 15.807          | 19.511          | 0.610           | 0.479              | 0.903           | 4.469           |
| Gau-Grouping [50] | 15.311          | 0.648           | 0.447              | 10.529          | 46.358          | 19.633          | 0.635           | 0.446              | 15.330          | 50.737          |
| DNGaussian [25]   | 15.820          | 0.699           | 0.473              | 12.564          | 50.876          | 19.120          | 0.656           | 0.516              | 13.036          | 44.122          |
| FSGS [60]         | 16.511          | 0.659           | 0.433              | 11.857          | 53.064          | 22.094          | 0.682           | 0.417              | 13.069          | 45.399          |
| CoR-GS [56]       | 16.303          | 0.706           | 0.416              | 11.175          | 49.935          | 22.897          | 0.703           | 0.410              | 12.628          | 43.501          |
| Ours              | <b>18.244</b>   | <b>0.725</b>    | <b>0.386</b>       | <b>26.651</b>   | <b>67.365</b>   | <b>24.998</b>   | <b>0.723</b>    | <b>0.354</b>       | <b>27.472</b>   | <b>61.194</b>   |

Table 13. Quantitative results of reconstruction and segmentation on novel views across various scenes from Replica and ScanNet datasets, using the CLIP [37] for optimizing Gaussian semantic attributes with 12 training views. Our approach achieves **superior performances** in both reconstruction quality and segmentation accuracy.

| Method            | Room0           |                 |                    |                 |                 | Room1           |                 |                    |                 |                 |
|-------------------|-----------------|-----------------|--------------------|-----------------|-----------------|-----------------|-----------------|--------------------|-----------------|-----------------|
|                   | PSNR $\uparrow$ | SSIM $\uparrow$ | LPIPS $\downarrow$ | mIoU $\uparrow$ | mAcc $\uparrow$ | PSNR $\uparrow$ | SSIM $\uparrow$ | LPIPS $\downarrow$ | mIoU $\uparrow$ | mAcc $\uparrow$ |
| 3DOVS [31]        | 16.277          | 0.557           | 0.464              | 17.789          | 62.604          | 14.717          | 0.513           | 0.661              | 7.771           | 41.968          |
| Feature 3DGS [59] | 16.992          | 0.599           | 0.405              | 14.700          | 58.249          | 17.532          | 0.650           | 0.373              | 12.257          | 57.894          |
| Gau-Grouping [50] | 17.548          | 0.636           | 0.392              | 20.618          | 65.525          | 18.857          | 0.681           | 0.348              | 16.899          | 63.053          |
| DNGaussian [25]   | 17.168          | 0.633           | 0.467              | 19.914          | 62.975          | 20.731          | 0.722           | 0.378              | 21.399          | 68.646          |
| FSGS [60]         | 19.720          | 0.696           | 0.336              | 21.967          | 66.214          | 20.969          | 0.731           | 0.303              | 19.626          | 67.325          |
| CoR-GS [56]       | 19.362          | 0.707           | 0.351              | 19.377          | 61.534          | 19.603          | 0.732           | 0.329              | 16.332          | 60.915          |
| Ours              | <b>20.944</b>   | <b>0.716</b>    | <b>0.311</b>       | <b>25.740</b>   | <b>70.296</b>   | <b>22.541</b>   | <b>0.761</b>    | <b>0.252</b>       | <b>23.539</b>   | <b>71.692</b>   |

  

| Method            | Room2           |                 |                    |                 |                 | Office0         |                 |                    |                 |                 |
|-------------------|-----------------|-----------------|--------------------|-----------------|-----------------|-----------------|-----------------|--------------------|-----------------|-----------------|
|                   | PSNR $\uparrow$ | SSIM $\uparrow$ | LPIPS $\downarrow$ | mIoU $\uparrow$ | mAcc $\uparrow$ | PSNR $\uparrow$ | SSIM $\uparrow$ | LPIPS $\downarrow$ | mIoU $\uparrow$ | mAcc $\uparrow$ |
| 3DOVS [31]        | 13.540          | 0.570           | 0.660              | 7.886           | 44.913          | 14.580          | 0.483           | 0.677              | 4.347           | 25.848          |
| Feature 3DGS [59] | 18.338          | 0.742           | 0.342              | 16.536          | 67.860          | 21.738          | 0.771           | 0.285              | 13.247          | 56.463          |
| Gau-Grouping [50] | 17.910          | 0.737           | 0.341              | 18.196          | 67.612          | 20.530          | 0.751           | 0.313              | 16.006          | 54.395          |
| DNGaussian [25]   | 20.991          | 0.784           | 0.333              | 24.145          | 76.987          | 21.700          | 0.785           | 0.352              | 18.991          | 59.040          |
| FSGS [60]         | 20.149          | 0.781           | 0.272              | 24.636          | 76.413          | 22.580          | 0.810           | 0.252              | 19.137          | 59.542          |
| CoR-GS [56]       | 19.893          | 0.805           | 0.265              | 23.611          | 74.854          | 22.715          | 0.808           | 0.253              | 19.845          | 59.545          |
| Ours              | <b>22.879</b>   | <b>0.838</b>    | <b>0.210</b>       | <b>26.995</b>   | <b>78.006</b>   | <b>23.134</b>   | <b>0.819</b>    | <b>0.249</b>       | <b>23.166</b>   | <b>62.666</b>   |

  

| Method            | Office2         |                 |                    |                 |                 | Office4         |                 |                    |                 |                 |
|-------------------|-----------------|-----------------|--------------------|-----------------|-----------------|-----------------|-----------------|--------------------|-----------------|-----------------|
|                   | PSNR $\uparrow$ | SSIM $\uparrow$ | LPIPS $\downarrow$ | mIoU $\uparrow$ | mAcc $\uparrow$ | PSNR $\uparrow$ | SSIM $\uparrow$ | LPIPS $\downarrow$ | mIoU $\uparrow$ | mAcc $\uparrow$ |
| 3DOVS [31]        | 9.687           | 0.497           | 0.753              | 6.912           | 40.524          | 11.157          | 0.502           | 0.721              | 8.448           | 35.599          |
| Feature 3DGS [59] | 18.812          | 0.788           | 0.281              | 20.073          | 79.211          | 15.513          | 0.701           | 0.346              | 21.328          | 70.054          |
| Gau-Grouping [50] | 17.130          | 0.756           | 0.323              | 26.287          | 78.060          | 14.748          | 0.692           | 0.384              | 23.505          | 70.468          |
| DNGaussian [25]   | 21.082          | 0.822           | 0.311              | 27.715          | 81.715          | 18.115          | 0.748           | 0.381              | 29.989          | 74.869          |
| FSGS [60]         | 20.486          | 0.817           | 0.251              | 27.564          | 82.127          | 18.324          | 0.772           | 0.294              | 29.397          | 75.789          |
| CoR-GS [56]       | 20.354          | 0.830           | 0.255              | 26.757          | 82.480          | 18.467          | 0.792           | 0.286              | 29.053          | 74.079          |
| Ours              | <b>23.413</b>   | <b>0.868</b>    | <b>0.200</b>       | <b>39.293</b>   | <b>88.195</b>   | <b>19.825</b>   | <b>0.798</b>    | <b>0.266</b>       | <b>36.304</b>   | <b>82.039</b>   |

  

| Method            | scene0004       |                 |                    |                 |                 | scene0389       |                 |                    |                 |                 |
|-------------------|-----------------|-----------------|--------------------|-----------------|-----------------|-----------------|-----------------|--------------------|-----------------|-----------------|
|                   | PSNR $\uparrow$ | SSIM $\uparrow$ | LPIPS $\downarrow$ | mIoU $\uparrow$ | mAcc $\uparrow$ | PSNR $\uparrow$ | SSIM $\uparrow$ | LPIPS $\downarrow$ | mIoU $\uparrow$ | mAcc $\uparrow$ |
| 3DOVS [31]        | 17.829          | 0.616           | 0.498              | 23.079          | 75.464          | 21.882          | 0.739           | 0.515              | 24.401          | 81.412          |
| Feature 3DGS [59] | 18.038          | 0.618           | 0.406              | 16.215          | 77.017          | 24.682          | 0.806           | 0.337              | 31.594          | 89.220          |
| Gau-Grouping [50] | 17.975          | 0.631           | 0.411              | 28.301          | 74.673          | 22.931          | 0.779           | 0.365              | 43.316          | 83.081          |
| DNGaussian [25]   | 17.853          | 0.636           | 0.487              | 25.833          | 73.883          | 25.363          | 0.819           | 0.374              | 39.106          | 89.642          |
| FSGS [60]         | 19.399          | 0.672           | 0.411              | 28.743          | 78.000          | 26.784          | 0.844           | 0.328              | 39.576          | 89.337          |
| CoR-GS [56]       | 19.331          | 0.673           | 0.412              | 29.863          | 79.074          | 26.573          | 0.828           | 0.333              | 37.277          | 89.190          |
| Ours              | <b>19.631</b>   | <b>0.681</b>    | <b>0.403</b>       | <b>40.120</b>   | <b>84.554</b>   | <b>27.512</b>   | <b>0.847</b>    | <b>0.320</b>       | <b>63.541</b>   | <b>89.646</b>   |

  

| Method            | scene0494       |                 |                    |                 |                 | scene0693       |                 |                    |                 |                 |
|-------------------|-----------------|-----------------|--------------------|-----------------|-----------------|-----------------|-----------------|--------------------|-----------------|-----------------|
|                   | PSNR $\uparrow$ | SSIM $\uparrow$ | LPIPS $\downarrow$ | mIoU $\uparrow$ | mAcc $\uparrow$ | PSNR $\uparrow$ | SSIM $\uparrow$ | LPIPS $\downarrow$ | mIoU $\uparrow$ | mAcc $\uparrow$ |
| 3DOVS [31]        | 16.703          | 0.676           | 0.560              | 26.038          | 75.165          | 18.930          | 0.577           | 0.566              | 22.487          | 59.412          |
| Feature 3DGS [59] | 15.448          | 0.659           | 0.426              | 17.940          | 67.083          | 20.641          | 0.629           | 0.443              | 18.461          | 57.569          |
| Gau-Grouping [50] | 15.594          | 0.670           | 0.428              | 34.902          | 67.838          | 20.255          | 0.649           | 0.471              | 27.678          | 68.902          |
| DNGaussian [25]   | 15.240          | 0.664           | 0.475              | 32.891          | 67.215          | 22.469          | 0.704           | 0.468              | 30.657          | 68.838          |
| FSGS [60]         | 17.058          | 0.691           | 0.413              | 37.701          | 74.877          | 24.257          | 0.713           | 0.391              | 32.422          | 69.146          |
| CoR-GS [56]       | 17.386          | 0.716           | 0.406              | 38.263          | 75.702          | 23.913          | 0.724           | 0.399              | 31.276          | 67.810          |
| Ours              | <b>19.711</b>   | <b>0.756</b>    | <b>0.355</b>       | <b>52.016</b>   | <b>81.288</b>   | <b>25.315</b>   | <b>0.737</b>    | <b>0.357</b>       | <b>45.407</b>   | <b>78.849</b>   |

Table 14. Quantitative results of reconstruction and segmentation on novel views across various scenes from Replica and ScanNet datasets, using CLIP-LSeg [24] for optimizing Gaussian semantic attributes with 12 training views. Our approach achieves **superior performances** in both reconstruction quality and segmentation accuracy.
